# Supplementary material for: Glycan Epitopes and Potential Glycoside Antagonists of DC-SIGN Involved in COVID-19: In Silico Study
Source: Biomolecules. 2021 Oct 27;11(11):1586. doi: 10.3390/biom11111586 (PMC8615854; doi:10.3390/biom11111586)
Supplement: Supplementary file 1 [file biomolecules-11-01586-s001.zip › biomolecules-1395746-supplementary.pdf]

## Supplementary

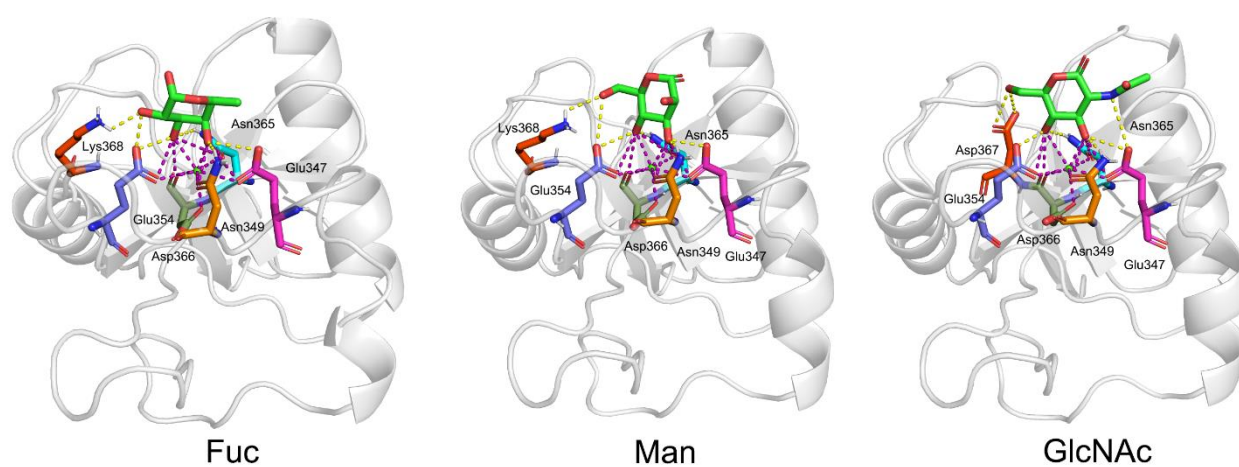

**Figure S1.** Binding mode for different monosaccharides (Fuc, Man, GlcNAc) in DC-SIGN. It was constructed by Glide V8.9 and worked as initial conformations of MD.

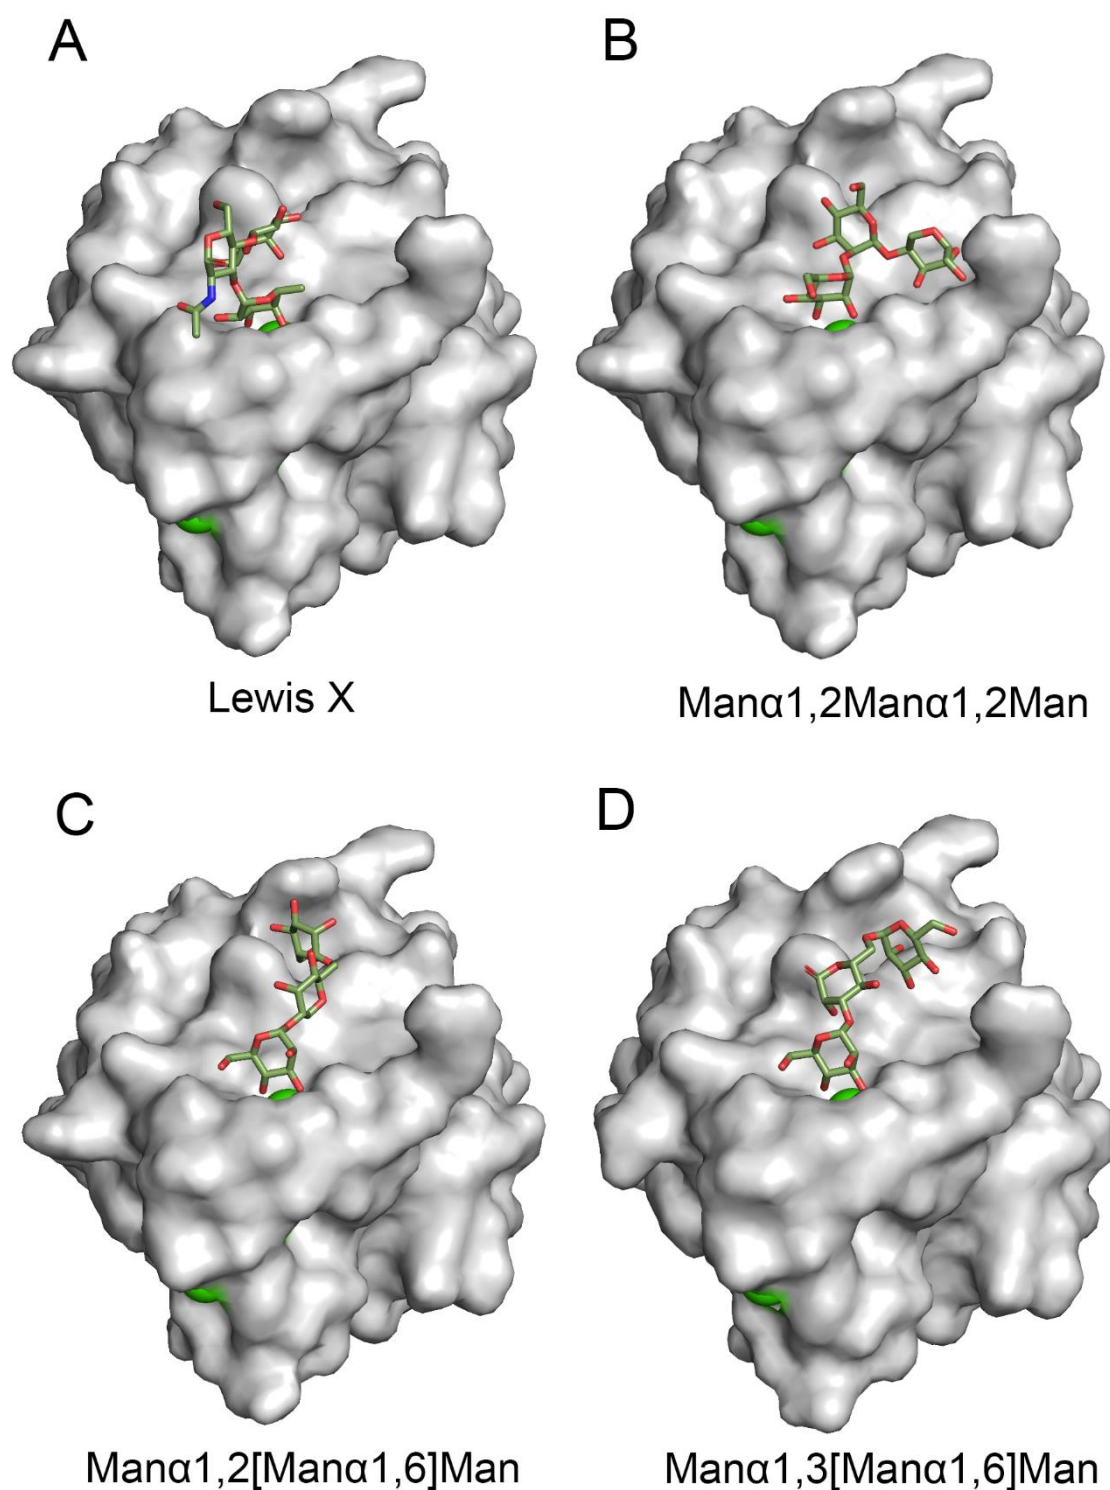

**Figure S2.** Binding mode for different oligosaccharides in DC-SIGN. A Lewis X; B Man $\alpha$ 1,2Man $\alpha$ 1,2Man; C Man $\alpha$ 1,2[Man $\alpha$ 1,6]Man; D Man $\alpha$ 1,3[Man $\alpha$ 1,6]Man. The binding conformations between published glycan epitopes and DC-SIGN. It was constructed by Glide V8.9 and worked as initial conformations of MD.

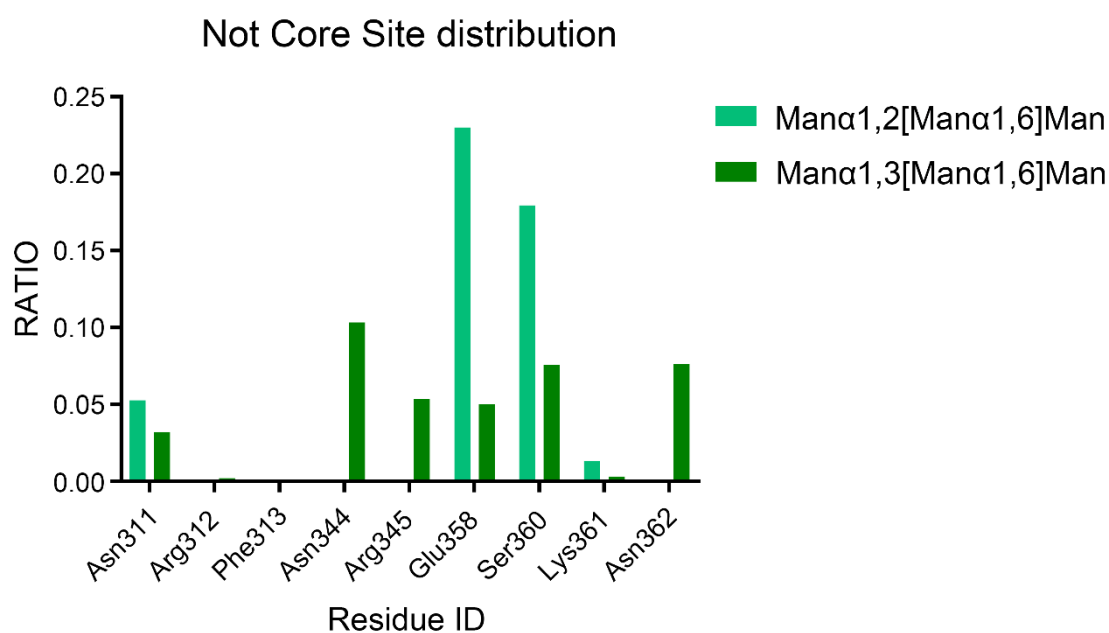

**Figure S3.** Comparison of the residue hydrogen bond distribution RATIO between Man $\alpha$ 1,2[Man $\alpha$ 1,6]Man and Man $\alpha$ 1,3[Man $\alpha$ 1,6]Man without considering the core site hydrogen bonding.

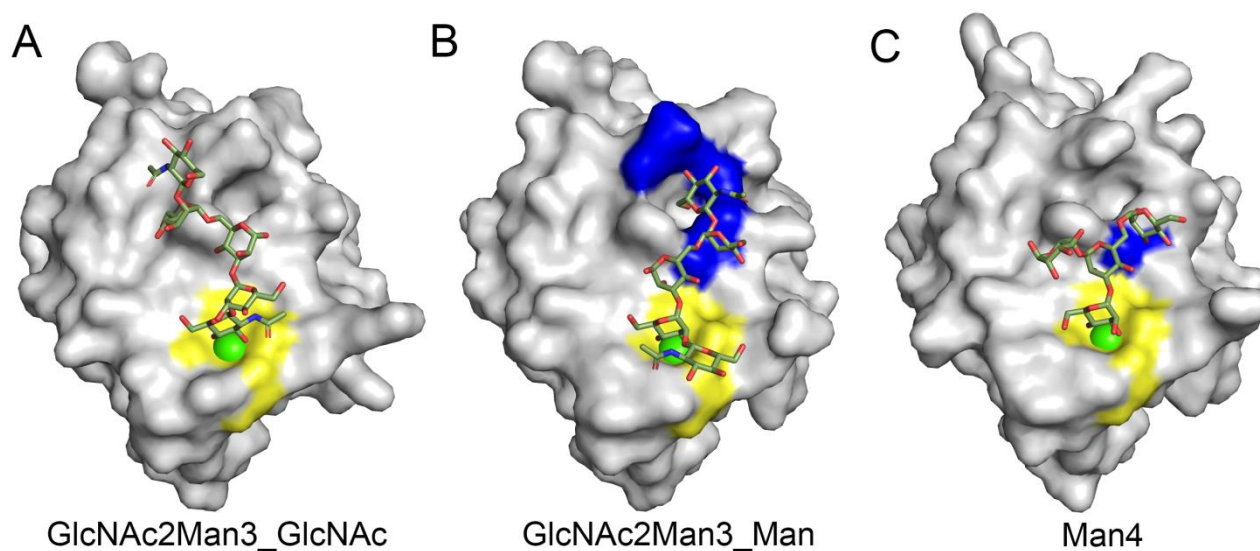

**Figure S4.** The conformations of Man4 and GlcNAc2Man3 combined with DC-SIGN in the crystal structure. A Conformation of the binding between Ca<sup>2+</sup> in DC-SIGN and the outermost GlcNAc in GlcNAc2Man3. B Conformation of the binding between Ca<sup>2+</sup> in DC-SIGN and Man in GlcNAc2Man3. C Conformation and pocket of Man4 combined with DC-SIGN. Core site are shown by yellow, Rift site are shown in blue; (PDB: 1K9I, 1SL4).

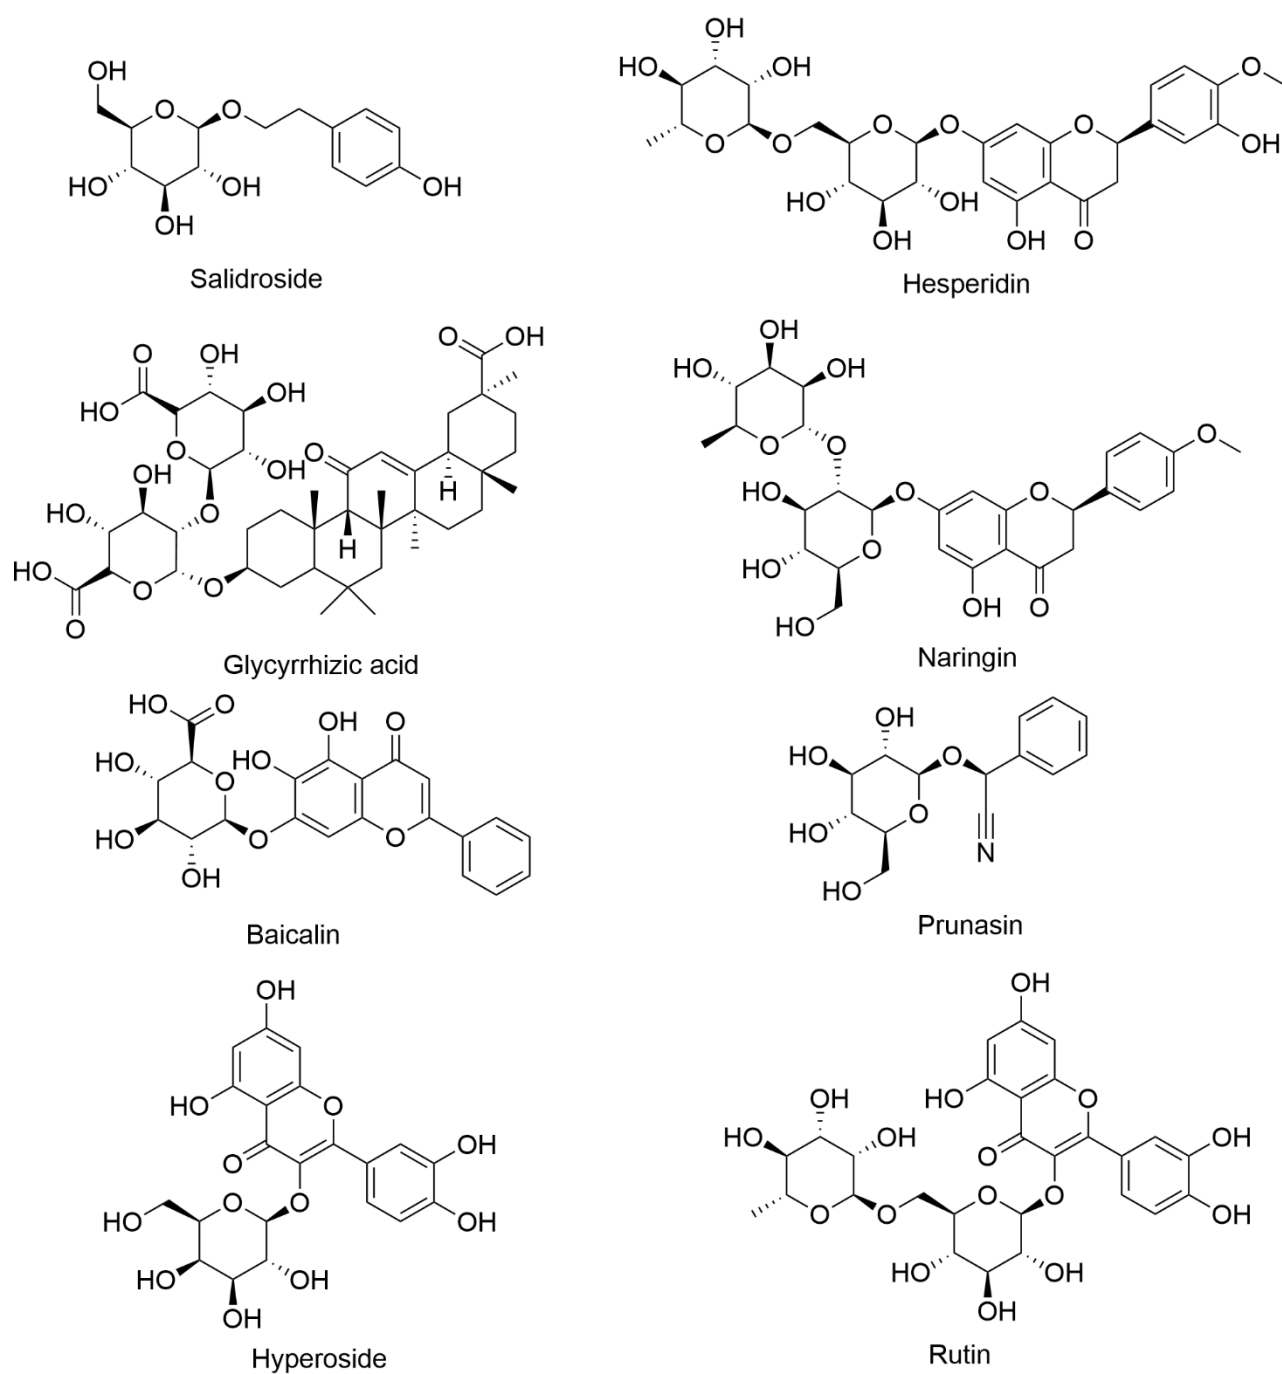

**Figure S5.** The structure of the remaining eight natural glycosides in Qingfei Paidu Decoction, except for Saikosaponin A and Liquiritin.

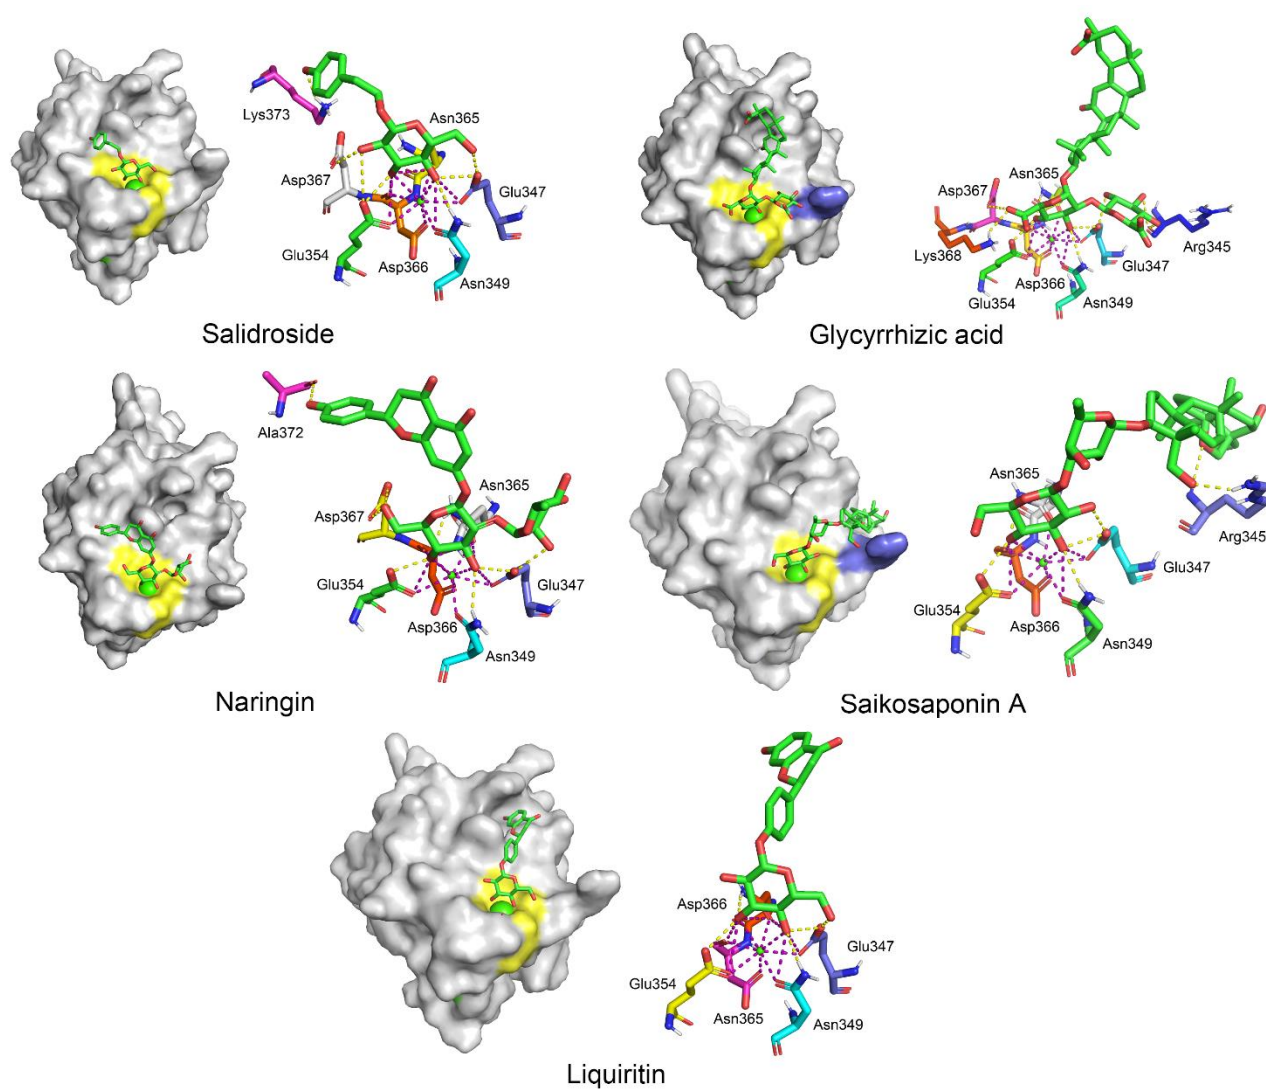

**Figure S6.** Binding mode for different natural product glycosides in DC-SIGN. It was constructed by Glide V8.9 and worked as initial conformations of MD. The core site is formed by Glu347, Asn349, Glu354, Asn365, Asp366. And the valley site is formed by Asn344, Arg345, and Asn362. Core site are shown in yellow; Valley are shown in purple/blue.

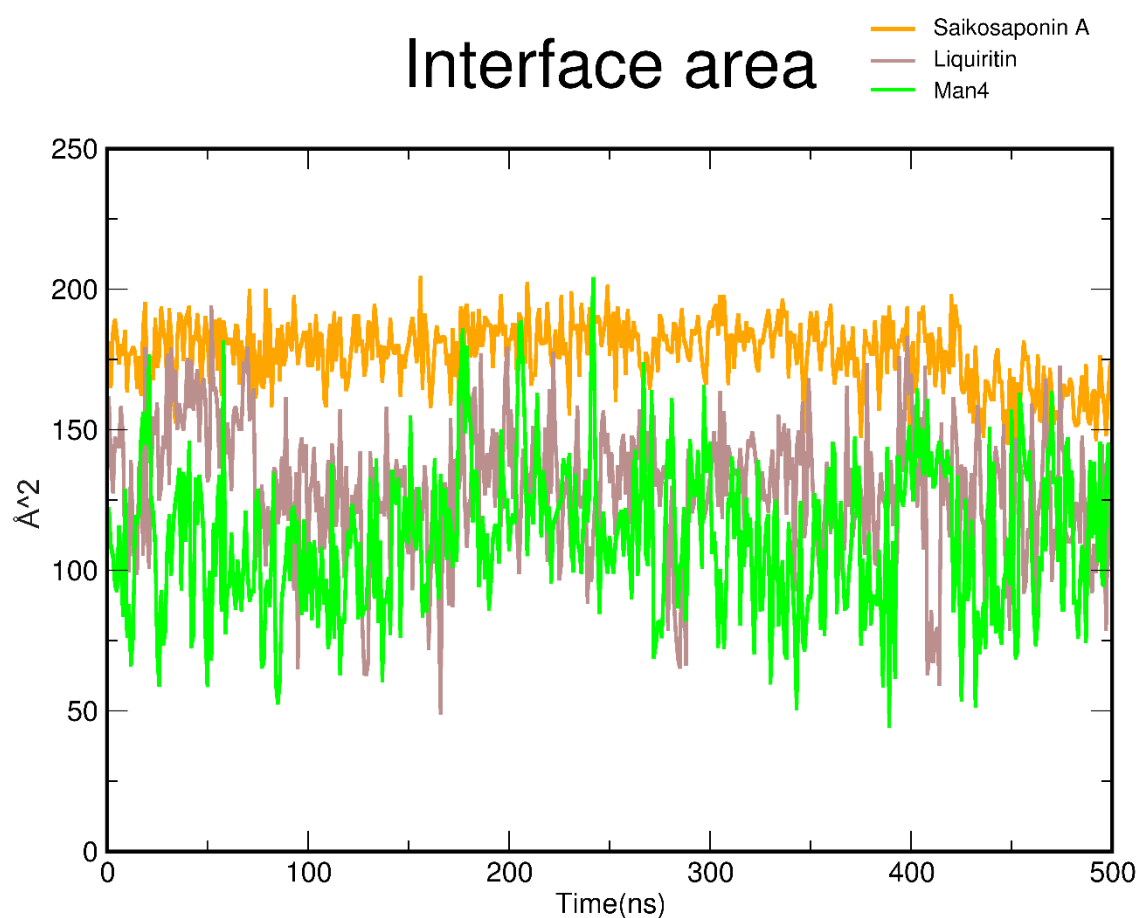

**Figure S7.** Interface area between three ligands and DC-SIGN. The order of the interface area size is that: Saikosaponin A > Liquiritin > Man4.

## Supplementary Table

**Table S1.** Interface Area in the initial crystal structures.

| Compounds (Å <sup>2</sup> ) | SASA <sub>protein</sub> | SASA <sub>ligand</sub> | SASA <sub>complex</sub> | Interface Area |
|-----------------------------|-------------------------|------------------------|-------------------------|----------------|
| Fuc                         | 6338.4593               | 158.5075               | 6374.8992               | 61.0338        |
| Man                         | 6270.1932               | 161.9391               | 6315.0913               | 58.5205        |
| GlcNAc                      | 5993.6415               | 211.8934               | 6108.5823               | 48.4763        |
| Man $\alpha$ 1,2Man         | 6270.1932               | 271.1824               | 6329.9183               | 105.72865      |
| Lewis X                     | 6338.4593               | 398.3933               | 6526.1542               | 105.3492       |
| Man4                        | 6286.1805               | 516.6714               | 6586.8111               | 108.0204       |
| GlcNAc2Man3_Man             | 5926.7745               | 704.6171               | 6222.5675               | 204.41205      |
| GlcNAc2Man3_GlcNAc          | 5992.8016               | 704.6171               | 6587.7838               | 54.81745       |

\* Solvable accessible surface area (SASA).

**Table S2.** The binding free energy of Saikosaponin A and Liquiritin by MM-GBSA.

| Energy Component (kcal/mol) | Saikosaponin A | Liquiritin | Man4     |
|-----------------------------|----------------|------------|----------|
| VDWAALS                     | -29.4311       | -13.2193   | -23.0099 |
| EEL                         | -42.2283       | -66.3147   | -54.8062 |
| EGB                         | 56.2091        | 68.4339    | 73.6976  |
| ESURF                       | -4.5279        | -3.5974    | -4.5727  |
| DELTA TOTAL                 | -19.9782       | -14.6975   | -8.6912  |

---

## Supplementary Videos

**Video S1.** The dynamic video of GlcNAc2Man3\_GlcNAc in the DC-SIGN protein binding pocket. (Core site in yellow; “Valley” pocket in violet; “Rift” pocket in blue).
